# Supplementary material
Source: PubMed Central journal article supplement (PMC4633926)
Supplement: supp_nov060_nov060supp_table1.pdf [file supp_nov060_nov060supp_table1.pdf]

| Gene                              | Primer  | Sequence of Primer                       |
|-----------------------------------|---------|------------------------------------------|
| Human MAP2                        | Forward | 5' -GAA GGA CTT GTC CGA AGC G-3'         |
|                                   | Reverse | 5' -TCT CCG TTG ATC CCA TTC TCT T-3'     |
| Rat MAP2                          | Forward | 5' -GGG CCT TCT CCT TGA AAT CCA GCT T-3' |
|                                   | Reverse | 5' -CAA ATG TGG CTC TCT AAA GAA CA-3'    |
| Rat STAT3                         | Forward | 5' -GAT CCA GTC TGT AGA ACC AT-3'        |
|                                   | Reverse | 5' -ATA GCC CAT GAT GAT TTC AGC AA-3'    |
| Rat JUN                           | Forward | 5' -AAG AAC ACA AAG CAG GGA GG-3'        |
|                                   | Reverse | 5' -GGG AGT TCA TCC GCA ATC TA-3'        |
| Human and Rat GAPDH               | Forward | 5' - TCA CCA CCA TGG AGA AGG C-3'        |
|                                   | Reverse | 5' - GCT AAG CAG TTG GTG GTG CA-3'       |
| Human MAP2 (ChIP assay)           | Forward | 5' -CAT GCC CTT CAA CTT GTC CT-3'        |
|                                   | Reverse | 5' -TGG CAA TGT GGA GAA TGG TA-3'        |
| ChIP assay positive control (p21) | Forward | 5' -TTC AGG AGA CAG ACA ACT CAC TC-3'    |
|                                   | Reverse | 5' -GAC ACC CCA ACA AAG CAT CTT G-3'     |
