# Supplementary material
Source: PubMed Central journal article supplement (PMC4633926)
Supplement: supp_nov060_nov060supp_table2.pdf [file supp_nov060_nov060supp_table2.pdf]

| Variable                                           | Number | Percentage |
|----------------------------------------------------|--------|------------|
| Patients (n)                                       | 22     | 100%       |
| Age (years)                                        |        |            |
| Median                                             | 43.91  |            |
| Range                                              | 26~73  |            |
| Gender                                             |        |            |
| Male                                               | 15     | 68.2%      |
| Female                                             | 7      | 31.8%      |
| Ethnicity/Nationality                              |        |            |
| Chinese/Han                                        | 22     | 100%       |
| Chinse/Minority                                    | 0      | 0%         |
| Diagnosis                                          |        |            |
| Recurrent glioblastoma                             | 2      | 9.1%       |
| Newly diagnosed glioblastoma                       | 20     | 90.9%      |
| Prior Surgery                                      |        |            |
| Yes                                                | 2      | 9.1%       |
| No                                                 | 20     | 90.9%      |
| Prior Chemoradiotherapy                            |        |            |
| Yes                                                | 2      | 9.1%       |
| No                                                 | 20     | 90.9%      |
| Tumor Location                                     |        |            |
| Frontal                                            | 7      | 31.8%      |
| parietal                                           | 3      | 13.6%      |
| temporal                                           | 4      | 18.2%      |
| occipital                                          | 3      | 13.6%      |
| multiple lobes or central                          | 5      | 22.8%      |
| Tumor Size (cm)                                    |        |            |
| Median                                             | 34.64  |            |
| Range                                              | 19~54  |            |
| Pre-operation karnofsky performance status (score) |        |            |
| Median                                             | 80     |            |
| Range                                              | 60~100 |            |
| Surgery Feature                                    |        |            |
| Nature                                             |        |            |
| Emergency                                          | 0      | 0%         |
| Elective                                           | 22     | 100%       |
| Extent                                             |        |            |
| Gross total resection                              | 17     | 77.3%      |
| subtotal resection                                 | 5      | 22.7%      |

Supplementary Table S2, Patient demographic, clinicopathologic and treatment characteristics
